# Supplementary material
Source: ML conference proceedings conference paper supplement (https://openreview.net/forum?id=M75dBr10dZ)
Supplement: supplementary_material [file attachment]

# Can You Feel the Love Tonight

## Lead Sheet

**i4**  $\text{♩} = 65$   
B $\flat$  F/A E $\flat$ /G B $\flat$ /F E $\flat$  B $\flat$ /D F/A B $\flat$  Cm7 B $\flat$ /D

**A8**  
5 E $\flat$  B $\flat$ /D E $\flat$  B $\flat$ /D E $\flat$  B $\flat$ /D Cm7 F/A

9 E $\flat$  B $\flat$ /D E $\flat$  B $\flat$ /D E $\flat$  Gm A $\flat$  F

**B8**  
13 B $\flat$  F/A Gm E $\flat$  B $\flat$  E $\flat$  C7/E F

17 E $\flat$  B $\flat$ /D Gm E $\flat$  Cm7 B $\flat$ /D Cm/E $\flat$  C/E F

**B8**  
21 B $\flat$  F/A Gm E $\flat$  B $\flat$  E $\flat$  C7/E F

25 E $\flat$  B $\flat$ /D Gm E $\flat$  Cm B $\flat$ /D Cm/E $\flat$  F7sus E $\flat$ /B $\flat$  B $\flat$

**x4**  
29 1. B $\flat$  F/A E $\flat$ /G B $\flat$ /F E $\flat$  B $\flat$ /D F/A B $\flat$  Cm7 B $\flat$ /D

**O4**  
33 2. E $\flat$  B $\flat$ /D Gm E $\flat$  Cm B $\flat$ /D Cm/E $\flat$  F7sus E $\flat$ /B $\flat$  B $\flat$
