# Supplementary material
Source: ML conference proceedings conference paper supplement (https://openreview.net/forum?id=M75dBr10dZ)
Supplement: supplementary_material [file attachment]

# Can You Feel the Love Tonight

## Band Cover

**i4**  $\text{♩} = 65$

**Chords:** B $\flat$  F/A E $\flat$ /G B $\flat$ /F E $\flat$  B $\flat$ /D F/A B $\flat$  Cm7 B $\flat$ /D

**Melody**

**Celesta**

**Acoustic Guitar 1**

**Acoustic Guitar 2**

**Piano**

**Electric Piano 1**

**Electric Piano 2**

**Violins**

**Brass**

**Electric Bass**

**A8**

**5** E $\flat$  B $\flat$ /D E $\flat$  B $\flat$ /D E $\flat$  B $\flat$ /D Cm7 F/A

**Mel.**

**A.G. 2**

**E.P. 1**

**E.P. 2**

**Vlns.**

**Br.**

**E.B.**

## 2

9  $E\flat$   $B\flat/D$   $E\flat$   $B\flat/D$   $E\flat$   $Gm$   $A\flat$   $F$

Mel. 

A.G. 1 

A.G. 2 

Pno. 

E.P. 1 

E.P. 2 

Vlns. 

Br. 

E.B. 

**B8** 13  $B\flat$   $F/A$   $Gm$   $E\flat$   $B\flat$   $E\flat$   $C7/E$   $F$   $E\flat$   $B\flat/D$

Mel. 

A.G. 1 

A.G. 2 

E.P. 1 

Vlns. 

Br. 

E.B. 

18 Gm Eb Cm7 Bb/D Cm/Eb C/E F B8 Bb F/A

Mel.

A.G. 1

A.G. 2

E.P. 1

Vlms.

Br.

E.B.

22 Gm Eb Bb Eb C7/E F

Mel.

A.G. 1

A.G. 2

Vlms.

Br.

E.B.

25 x4

Mel. E $\flat$  B $\flat$ /D Gm E $\flat$  Cm B $\flat$ /D Cm/E $\flat$  F7sus E $\flat$ /B $\flat$  B $\flat$  B $\flat$  F/A

A.G. 1

A.G. 2

Pno.

E.P. 2

Vlns.

Br.

E.B.

30 A8

Mel. E $\flat$ /G B $\flat$ /F E $\flat$  B $\flat$ /D F/A B $\flat$  Cm7 B $\flat$ /D E $\flat$  B $\flat$ /D

A.G. 1

A.G. 2

Pno.

E.P. 2

E.B.

34 Eb Bb/D Eb Bb/D Cm7 F/A

Mel.

Pno.

E.B.

37 Eb Bb/D Eb Bb/D Eb Gm

Mel.

Cel.

Pno.

E.B.

40 Ab F B8 Bb F/A Gm Eb

Mel.

Cel.

A.G. 1

A.G. 2

Pno.

Vlms.

Br.

E.B.

## 6

43 B $\flat$  E $\flat$  C7/E F E $\flat$  B $\flat$ /D

Mel.

A.G. 1

A.G. 2

Pno.

Vlins.

Br.

E.B.

46 Gm E $\flat$  Cm7 B $\flat$ /D Cm/E $\flat$  C/E F

Mel.

A.G. 1

A.G. 2

Pno.

Vlins.

Br.

E.B.

**B8**

49 B $\flat$  F/A Gm E $\flat$  B $\flat$  E $\flat$  C7/E

Mel.

A.G. 1

A.G. 2

Pno.

Vlins.

Br.

E.B.

52 F E $\flat$  B $\flat$ /D Gm E $\flat$

Mel.

A.G. 1

A.G. 2

Pno.

Vlins.

Br.

E.B.

55 Cm B $\flat$ /D Cm/E $\flat$  F7sus E $\flat$ /B $\flat$  B $\flat$  **04** E $\flat$  B $\flat$ /D Gm E $\flat$

Mel.

A.G. 1

A.G. 2

Pno.

E.P. 1

E.P. 2

Vlns.

Br.

E.B.

59 Cm B $\flat$ /D Cm/E $\flat$  F7sus E $\flat$ /B $\flat$  B $\flat$

Mel.

E.P. 1

E.P. 2

Vlns.

E.B.
