# Supplementary material
Source: ML conference proceedings conference paper supplement (https://openreview.net/forum?id=M75dBr10dZ)
Supplement: supplementary_material [file attachment]

# Can You Feel the Love Tonight

## Piano Cover

**i4**  $\text{♩} = 65$   $\text{Bb}$   $\text{F/A}$   $\text{Eb/G}$   $\text{Bb/F}$   $\text{Eb}$   $\text{Bb/D}$   $\text{F/A}$   $\text{Bb}$   $\text{Cm7}$   $\text{Bb/D}$

Melody

Piano

5 **A8**  $\text{Eb}$   $\text{Bb/D}$   $\text{Eb}$   $\text{Bb/D}$   $\text{Eb}$   $\text{Bb/D}$   $\text{Cm7}$   $\text{F/A}$

Mel.

Pno.

9  $\text{Eb}$   $\text{Bb/D}$   $\text{Eb}$   $\text{Bb/D}$   $\text{Eb}$   $\text{Gm}$   $\text{Ab}$   $\text{F}$

Mel.

Pno.

13 **B8**  $\text{Bb}$   $\text{F/A}$   $\text{Gm}$   $\text{Eb}$   $\text{Bb}$   $\text{Eb}$   $\text{C7/E}$   $\text{F}$

Mel.

Pno.

The image displays a piano score for the song 'Can You Feel the Love Tonight'. It is organized into four systems, each containing a melody line and a piano accompaniment. The key signature is B-flat major (two flats), and the time signature is 4/4. The tempo is marked as quarter note = 65. The score includes chord symbols above the melody lines: Bb, F/A, Eb/G, Bb/F, Eb, Bb/D, F/A, Bb, Cm7, Bb/D in the first system; Eb, Bb/D, Eb, Bb/D, Eb, Bb/D, Cm7, F/A in the second; Eb, Bb/D, Eb, Bb/D, Eb, Gm, Ab, F in the third; and Bb, F/A, Gm, Eb, Bb, Eb, C7/E, F in the fourth. The piano accompaniment features a mix of chords and moving lines in both hands, with some measures containing triplets or sixteenth-note patterns. The melody line is mostly composed of eighth and quarter notes, with some rests. The systems are labeled with measure numbers 5, 9, and 13, and section markers i4, A8, and B8.

17 Eb Bb/D Gm Eb Cm7 Bb/D Cm/Eb C/E F

Mel.

Pno.

21 **B8** Bb F/A Gm Eb Bb Eb C7/E F

Mel.

Pno.

25 Eb Bb/D Gm Eb Cm Bb/D Cm/Eb F7sus Eb/Bb Bb

Mel.

Pno.

29 **x4** Bb F/A Eb/G Bb/F Eb Bb/D

Mel.

Pno.

32 F/A Bb Cm7 Bb/D Eb Bb/D Eb Bb/D

Mel.

Pno.

**A8**

35 Eb Bb/D Cm7 F/A Eb Bb/D

Mel.

Pno.

38 Eb Bb/D Eb Gm Ab F

Mel.

Pno.

41 **B8** Bb F/A Gm Eb Bb Eb C7/E

Mel.

Pno.

44 F Eb Bb/D Gm Eb

Mel.

Pno.

47 Cm7 Bb/D Cm/Eb C/E F Bb F/A

Mel.

Pno.

50 Gm Eb Bb Eb C7/E F

Mel.

Pno.

53 Eb Bb/D Gm Eb Cm Bb/D Cm/Eb F7sus

Mel.

Pno.

56 Eb/Bb Bb 04 Eb Bb/D Gm Eb

Mel.

Pno.

59 Cm Bb/D Cm/Eb F7sus Eb/Bb Bb

Mel.

Pno.
